# Supplementary material
Source: PubMed Central journal article supplement (PMC6832056)
Supplement: CJN.05560519SupplementaryData.pdf [file CJN.05560519SupplementaryData.pdf]

# Supplemental Table 1: Characteristics and Demographics of Included Studies

| First Author | Year | Study Type    | Multi-center vs Single-center | Name of Country or Registry              | Inclusion Criteria                                                                                               | Recruitment Time Frame (Years) | Follow-up         | Stratified Model             | n      | n events | Definition of graft loss                             | Female    | Female | Recipient            | Recipient            | Recipient   | Recipient BMI | Donor BMI | Ischemic Time        | Acute Rejection      | Dialysis pre-transplant | Duration of Dialysis (years) (mean/median) | Deceased donor | Diabetes mellitus   | Hypertension | Tacrolimus | Sirolimus | Cyclosporin | Prednisone | Myfortic |       |        |     |     |      |      |    |
|--------------|------|---------------|-------------------------------|------------------------------------------|------------------------------------------------------------------------------------------------------------------|--------------------------------|-------------------|------------------------------|--------|----------|------------------------------------------------------|-----------|--------|----------------------|----------------------|-------------|---------------|-----------|----------------------|----------------------|-------------------------|--------------------------------------------|----------------|---------------------|--------------|------------|-----------|-------------|------------|----------|-------|--------|-----|-----|------|------|----|
|              |      |               |                               |                                          |                                                                                                                  |                                |                   |                              |        |          |                                                      | Recipient | Donor  | Race: Black          | Race: Caucasian      | Race: Other |               |           |                      |                      |                         |                                            |                |                     |              |            |           |             |            |          |       |        |     |     |      |      |    |
| Adekoya      | 2016 | Retrospective | SC                            | UK                                       | Deceased donor transplants from donors > 60 years old                                                            | 1969-2009                      | NR                | NA                           | 112    | 41       | RRT, Death Censored                                  | 38        | 59     | 50.39 (13.72)*       | 64.71 (4)*           | NR          | NR            | NR        | NR                   | NR                   | NR                      | NR                                         | 112            | 45                  | NR           | 36         | NR        | NR          | NR         | NR       | NR    |        |     |     |      |      |    |
| An           | 2016 | Retrospective | MC                            | Korea                                    | Recipients <18 years old                                                                                         | 1997-2012                      | 6.4 [0 - 17.8]**  | NA                           | 2902   | 286      | RRT, nephrectomy, re-transplantation, Death Censored | 1190      | 1239   | 42 [33 - 51]**       | 40 [30 - 48]**       | NR          | NR            | NR        | 22.1 (20.1 - 24.4)** | 23.4 (21.2 - 25.6)** | NR                      | NR                                         | NR             | 642                 | NR           | 481        | 2441      | NR          | NR         | NR       | NR    | NR     |     |     |      |      |    |
| Anderson     | 2015 | Retrospective | MC                            | OPTN/UNOS                                | Recipients <18 years old with ECD kidneys                                                                        | 1987-2011                      | NR                | NA                           | 25640  | 11691    | NR                                                   | NR        | NR     | 57 (48 - 65)**       | 61 (55 - 65)**       | 736         | 13213         | 1904      | 26.7 (23.6 - 30.4)** | 26.9 (23.8 - 30.8)** | 19 (14 - 26)**          | NR                                         | 20985          | NR                  | 25640        | 25640      | 8421      | NR          | 16910      | NR       | NR    | NR     | NR  |     |      |      |    |
| Andreoni     | 2013 | Retrospective | MC                            | OPTN/UNOS                                | Recipients <65 years with no transplant history, primary graft from living or standard d-criteria deceased donor | 1987-2010                      | 6**               | NA                           | 168809 | 46854    | NR, Death Censored                                   | 68705     | 78159  | 37.7 (12.6)*         | 34.4 (14)*           | 40363       | 95433         | 33013     | NR                   | NR                   | NR                      | NR                                         | 0              | 0                   | NR           | 2104       | 8784      | NR          | NR         | NR       | NR    | NR     |     |     |      |      |    |
| Andresdottir | 2005 | Retrospective | MC                            | Euro-transplant International foundation | Recipients <18 years of age with IgA nephropathy, who received a primary cadaveric renal graft                   | 1990-2002                      | NR                | Immunoglobulin A nephropathy | 1207   | 93       | NR, Death Censored                                   | 229       | 506    | NR                   | NR                   | NR          | NR            | NR        | NR                   | NR                   | NR                      | NR                                         | NR             | NR                  | NR           | NR         | NR        | NR          | NR         | NR       | NR    | NR     |     |     |      |      |    |
| Andresdottir | 2005 | Retrospective | MC                            | Euro-transplant International foundation | Recipients <18 years of age with IgA nephropathy, who received a primary cadaveric renal graft                   | 1990-2002                      | NR                | Controls                     | 7935   | 881      | NR, Death Censored                                   | 4317      | 3142   | NR                   | NR                   | NR          | NR            | NR        | NR                   | NR                   | NR                      | NR                                         | NR             | NR                  | NR           | NR         | NR        | NR          | NR         | NR       | NR    | NR     |     |     |      |      |    |
| Aderakis     | 2001 | Retrospective | SC                            | UK                                       | First deceased donor kidney transplants                                                                          | 1990-1997                      | NR                | NA                           | 788    | NR       | NR, Death Included                                   | 254       | NR     | 42.1 (15.5)*         | NR                   | NR          | NR            | NR        | NR                   | NR                   | NR                      | NR                                         | NR             | 184                 | NR           | NR         | NR        | NR          | NR         | NR       | NR    | NR     |     |     |      |      |    |
| Bay          | 2013 | Retrospective | MC                            | Denmark                                  | All adult renal transplants                                                                                      | 1998-2009                      | NR                | NA                           | 676    | 97       | NR, Death Censored                                   | 255       | 360    | 42.7 (14.7)*         | 47.3 (14.8)*         | NR          | NR            | NR        | NR                   | NR                   | NR                      | NR                                         | NR             | 456                 | NR           | 86         | 62        | NR          | NR         | NR       | NR    | NR     |     |     |      |      |    |
| Boffa        | 2017 | Retrospective | MC                            | UK                                       | First adult kidney-only transplants                                                                              | 2003 - 2013                    | NR                | NA                           | 11,655 | NR       | NR, Death Included                                   | NR        | NR     | NR                   | NR                   | 807         | 9087          | 1761      | NR                   | NR                   | NR                      | NR                                         | NR             | NR                  | NR           | NR         | NR        | NR          | NR         | NR       | NR    | NR     |     |     |      |      |    |
| Brar         | 2013 | Retrospective | MC                            | USRDS                                    | First kidney transplant                                                                                          | 2004 - 2009                    | 5.04*             | NA                           | 80,880 | 6,855    | RRT                                                  | 31637     | NR     | 48.2**               | 38.8 (15)*           | 10127       | 67188         | 2777      | 27.1 (5.7)*          | NR                   | NR                      | NR                                         | NR             | 50261               | 13266        | 24013      | 62909     | NR          | NR         | NR       | NR    | NR     |     |     |      |      |    |
| Cardinal     | 2005 | Retrospective | MC                            | Canada                                   | Recipients <60 years with first deceased donor kidney transplant                                                 | 1985 - 2000                    | 6**               | NA                           | 256    | 124      | RRT, re-transplant, Death Included                   | 81        | NR     | 63 (61 - 65)**       | 42 (23 - 51)**       | NR          | NR            | NR        | 25 (4)*              | NR                   | NR                      | NR                                         | NR             | 256                 | NR           | 37         | NR        | NR          | 40         | 3        | 214   | 252    | 76  |     |      |      |    |
| Carrier      | 2012 | Retrospective | MC                            | Canada                                   | NR                                                                                                               | 2003 - 2009                    | 3.5 [2]*          | NA                           | 1375   | 133      | RRT, re-transplant, Death Included                   | 715       | 359    | 51.3 (12.7)*         | 48.2 (11.5)*         | NR          | NR            | NR        | NR                   | NR                   | NR                      | NR                                         | NR             | 282                 | 792          | NR         | NR        | NR          | NR         | NR       | NR    | NR     |     |     |      |      |    |
| Courtney     | 2007 | Prospective   | SC                            | Ireland                                  | First deceased donor renal transplants                                                                           | 1986 - 2005                    | 8.2**             | NA                           | 707    | 198      | RRT, Death Censored                                  | 331       | 352    | 42 (16.7)**          | 37 (16.8)*           | 0           | 707           | 0         | NR                   | NR                   | NR                      | NR                                         | NR             | 707                 | NR           | NR         | NR        | NR          | NR         | NR       | NR    | NR     |     |     |      |      |    |
| Diaz         | 2009 | Retrospective | SC                            | Spain                                    | NR                                                                                                               | 1980 - 2004                    | 8 (4.6)*          | NA                           | 250    | 65       | NR, Death Included                                   | 87        | NR     | 47.7 (14.2)**        | NR                   | NR          | NR            | NR        | NR                   | NR                   | NR                      | NR                                         | NR             | NR                  | NR           | 17         | NR        | 58          | 0          | 192      | 250   | 127    |     |     |      |      |    |
| Dinis        | 2015 | Prospective   | SC                            | Portugal                                 | Non-hyperimmunized recipients (PRA < 80%) submitted to first and single deceased renal transplantations          | 2006 - 2009                    | 5.2*              | NA                           | 236    | NR       | NR                                                   | 84        | 92     | 49.35 (14)*          | 46.65 (16.5)*        | NR          | NR            | NR        | NR                   | NR                   | NR                      | NR                                         | NR             | 236                 | 57           | NR         | NR        | NR          | NR         | NR       | NR    | NR     |     |     |      |      |    |
| Faravadeh    | 2013 | Retrospective | SC                            | USA                                      | First adult kidney transplant recipients                                                                         | 1963 - 2012                    | 8.4*              | Recipient age > 65           | 364    | NR       | NR, Death Censored                                   | 136       | NR     | 69.5 (3.5)*          | NR                   | 12          | 328           | 24        | NR                   | NR                   | NR                      | NR                                         | NR             | 56                  | NR           | 2.22       | 51        | NR          | NR         | 101      | NR    | 94     | 22  | 273 | 160  | 6    |    |
| Faravadeh    | 2013 | Retrospective | SC                            | USA                                      | First adult kidney transplant recipients                                                                         | 1963 - 2012                    | 8.4*              | Recipient age 50 - 64        | 1218   | NR       | NR, Death Censored                                   | 505       | NR     | 57 (4.2)*            | NR                   | 49          | 1095          | 73        | NR                   | NR                   | NR                      | NR                                         | NR             | 201                 | NR           | 2.08       | 70        | NR          | NR         | 369      | NR    | 224    | 69  | 810 | 580  | 10   |    |
| Faravadeh    | 2013 | Retrospective | SC                            | USA                                      | First adult kidney transplant recipients                                                                         | 1963 - 2012                    | 8.4*              | Recipient age < 50           | 2900   | NR       | NR, Death Censored                                   | 1101      | NR     | 35.4 (8.7)*          | NR                   | 119         | 2630          | 146       | NR                   | NR                   | NR                      | NR                                         | NR             | 161 (5.97)*         | 490          | NR         | 1.4       | 57          | NR         | NR       | 691   | NR     | 269 | 91  | 1402 | 1285 | 12 |
| Ferrer       | 2009 | Retrospective | SC                            | Portugal                                 | Deceased donor kidney transplant                                                                                 | 2005 - 2009                    | NR                | NA                           | 409    | 46       | NR                                                   | 140       | NR     | 46.4 (10.3)*         | 44.3 (13.8)*         | NR          | NR            | NR        | NR                   | NR                   | NR                      | NR                                         | NR             | 183 (5.59)*         | 86           | NR         | 4.4       | 100         | NR         | 90       | NR    | NR     | NR  | NR  |      |      |    |
| Fuggle       | 2010 | Retrospective | MC                            | UK                                       | Adult recipients of first live donor kidney transplants                                                          | 2000 - 2007                    | 3.5**             | NA                           | 3144   | 309      | RRT, nephrectomy, Death Censored                     | 1253      | 1737   | 39.8 (29.2 - 49.2)** | 47.3 (38.6 - 55.3)** | 110         | 2762          | 278       | NR                   | NR                   | NR                      | NR                                         | NR             | 0                   | NR           | NR         | NR        | NR          | NR         | NR       | NR    | NR     | NR  |     |      |      |    |
| Grosso       | 2012 | Retrospective | SC                            | Italy                                    | Adult first kidney alone transplants                                                                             | 2000 - 2010                    | 13.6 (5.2)*       | NA                           | 376    | 52       | NR                                                   | 133       | 176    | 48.1 (12.25)*        | 51.2 (18.1)*         | NR          | NR            | NR        | NR                   | NR                   | NR                      | NR                                         | NR             | 161 (5.97)*         | NR           | NR         | 4.2       | NR          | 376        | 90       | NR    | NR     | NR  | NR  |      |      |    |
| Heldal       | 2013 | Retrospective | MC                            | Norway                                   | All patients > 70 years of age who received their first single kidney transplant                                 | 2000 - 2005                    | 5.1 (0.1 - 9.7)** | NA                           | 160    | 21       | RRT, Death Censored                                  | NR        | NR     | 73.6 (70 - 81.1)**   | 55.2 (4 - 82)**      | NR          | NR            | NR        | NR                   | NR                   | NR                      | NR                                         | NR             | NR                  | NR           | 48         | 22        | NR          | NR         | NR       | NR    | 148    | 160 | 137 |      |      |    |
| Heldal       | 2009 | Retrospective | SC                            | Denmark                                  | First kidney transplant                                                                                          | 1990 - 2005                    | NR                | Senior (60 - 69)             | 577    | 85       | RRT, Death Censored                                  | 179       | 260    | 64.8 (62.4 - 67.4)** | 51.7 (1 - 83)**      | 1 - 83      | NR            | NR        | NR                   | NR                   | NR                      | NR                                         | NR             | 321                 | 51           | NR         | NR        | NR          | NR         | NR       | NR    | NR     | NR  |     |      |      |    |
| Heldal       | 2009 | Retrospective | SC                            | Denmark                                  | First kidney transplant                                                                                          | 1990 - 2005                    | NR                | Control (45 - 54)            | 563    | 98       | RRT, Death Censored                                  | 197       | 282    | 50.2 (47.6 - 52.3)** | 47.1 (0 - 80)**      | 0 - 80      | NR            | NR        | NR                   | NR                   | NR                      | NR                                         | NR             | 142                 | 538          | 1.2        | NR        | 304         | 85         | NR       | NR    | NR     | NR  | NR  |      |      |    |
| Heldal       | 2009 | Retrospective | SC                            | Denmark                                  | First kidney transplant                                                                                          | 1990 - 2005                    | NR                | Elderly (70 - 81.5)          | 354    | 45       | RRT, Death Censored                                  | 110       | 152    | 73.5 (71.3 - 75.8)** | 51.3 (2 - 82)**      | 2 - 82      | NR            | NR        | NR                   | NR                   | NR                      | NR                                         | NR             | 404                 | 86           | NR         | NR        | NR          | NR         | NR       | NR    | NR     | NR  |     |      |      |    |
| Huaman       | 2016 | Retrospective | MC                            | OPTN/UNOS                                | All adults who underwent first, single organ deceased donor kidney transplantation                               | 2008 - 2013                    | NR                | NA                           | 51048  | NR       | RRT, re-transplant, Death Included                   | 20239     | 20585  | 53.8 (12.9)*         | 37.4 (16.6)*         | 7186        | NR            | NR        | 28.4 (5.4)*          | 27.4 (6.8)*          | 17.7 (17.1)*            | 2982                                       | NR             | 3.72                | NR           | 51048      | 13006     | 19321       | NR         | NR       | NR    | NR     | NR  |     |      |      |    |
| Ilori        | 2015 | Retrospective | MC                            | OPTN/UNOS                                | kidney transplant recipients aged < 60 years                                                                     | 1996 - 2010                    | 4.3 (5.2)****     | NA                           | 44,013 | 6206     | NR, Death Censored                                   | 16501     | NR     | 65 (7)*              | 43.2 (16)*           | 8903        | 27481         | 7629      | NR                   | NR                   | NR                      | NR                                         | NR             | 15 (18)****         | 4486         | 37848      | 2.47      | 9412        | 30799      | NR       | NR    | NR     | NR  | NR  |      |      |    |
| Kayler       | 2009 | Retrospective | MC                            | USA                                      | All kidney transplant recipients of adult donors                                                                 | 1995-2007                      | NR                | NA                           | 99240  | NR       | NR                                                   | NR        | 18889  | NR                   | 38**                 | 112%        | NR            | NR        | NR                   | NR                   | NR                      | NR                                         | NR             | 256                 | NR           | NR         | NR        | NR          | NR         | NR       | NR    | NR     | NR  |     |      |      |    |
| Koo          | 2015 | Retrospective | SC                            | South Korea                              | NR                                                                                                               | 2000 - 2009                    | NR                | NA                           | 709    | 65       | RRT, nephrectomy, re-transplantation, Death Censored | 321       | 317    | 41.4 (33.2 - 49.4)** | 40.5 (31.3 - 47.8)** | NR          | NR            | NR        | 22.2 (20 - 25)**     | NR                   | NR                      | NR                                         | NR             | 1.1 (0.8 - 2.3)**   | 198          | NR         | 1.2       | NR          | 153        | 35       | 99    | NR     | 367 | NR  | 334  | NR   |    |
| Kruger       | 2007 | Retrospective | SC                            | Germany                                  | First renal transplant                                                                                           | 1995 - 2006                    | 3.65 (2.61)*      | NA                           | 352    | NR       | NR, Death Censored                                   | 112       | NR     | 50.5 (13.8)*         | 50.3 (15.8)*         | NR          | NR            | NR        | NR                   | NR                   | NR                      | NR                                         | NR             | 124                 | 329          | 4          | NR        | 272         | 60         | 60       | 336   | NR     | NR  | NR  | NR   |      |    |
| Lee          | 2014 | Retrospective | SC                            | South Korea                              | First living donor kidney transplantations                                                                       | 2000 - 2011                    | NR                | NA                           | 201    | 15       | NR, Death Censored                                   | 75        | 96     | 40.02 (10)*          | 38.5 (10.5)*         | NR          | NR            | NR        | 22.5 (2.8)*          | 23.1 (2.9)*          | 0.9 (0.35)*             | NR                                         | 121            | 14.7                | NR           | 0          | NR        | NR          | NR         | NR       | 88    | 0      | 113 | NR  | NR   |      |    |
| Lin          | 2004 | Retrospective | SC                            | Taiwan                                   | First deceased donor transplants                                                                                 | 1981-2000                      | 5.61 (3.98)*      | NA                           | 299    | 162      | RRT, Death Included                                  | 128       | 54     | 35 (10)*             | 29.5 (11.01)*        | NR          | NR            | NR        | NR                   | NR                   | NR                      | NR                                         | NR             | 78                  | NR           | NR         | NR        | NR          | 299        | NR       | 8     | 118    | NR  | NR  | NR   |      |    |
| Lynch        | 2009 | Retrospective | SC                            | USA                                      | All adult first kidney only transplants                                                                          | 2003-2008                      | NR                | NR                           | 869    | NR       | NR                                                   | 316       | NR     | 50.01**              | NR                   | 149         | NR            | NR        | NR                   | NR                   | NR                      | NR                                         | NR             | 446                 | NR           | 299        | NR        | NR          | NR         | NR       | NR    | NR     | NR  |     |      |      |    |
| Molnar       | 2012 | Retrospective | MC                            | SRTIR                                    | All kidney transplant recipients                                                                                 | 1998 - 2006                    | 3.9 (1.9 - 6.8)** | NA                           | 145470 | 22876    | RRT, re-transplant, Death Censored                   | 57821     | NR     | 47.1 (4.6)*          | 38.5 (14.4)*         | 33276       | 85827         | 26367     | 26.7 (5.4)*          | NR                   | NR                      | NR                                         | NR             | 12.3 (1.7 - 20.6)** | 7306         | NR         | NR        | 22516       | 80084      | NR       | 28853 | 119869 | NR  | NR  | NR   | NR   |    |
| Molnar       | 2013 | Retrospective | MC                            | USA                                      | All kidney transplant recipients who underwent dialysis pre-transplant                                           | 2001-2006                      | 6**               | NR                           | 8961   | 785      | RRT, re-transplant, Death Censored                   | 3316      | NR     | 48 (13)**            | 39 (15)*             | 2420        | NR            | NR        | 26.6 (5.7)*          | NR                   | NR                      | NR                                         | NR             | 144 (10.6)*         | NR           | NR         | NR        | 1703        | NR         | 1951     | 2420  | NR     | NR  | NR  | NR   |      |    |
| Moore        | 2010 | Retrospective | SC                            | UK                                       | All consecutive kidney transplant                                                                                | 1996 - 2006                    | 5.75**            | NA                           | 697    | 301      | RRT, re-transplant, Death Censored                   | 262       | 285    | 41.6 (16.7)*         | 36.5 (16.8)*         | 0           | 697           | 0         | NR                   | NR                   | NR                      | NR                                         | NR             | 697                 | NR           | NR         | NR        | NR          | NR         | NR       | NR    | NR     | NR  |     |      |      |    |
| Namoku       | 2012 | Prospective   | SC                            | Japan                                    | NR                                                                                                               | 2000 - 2009                    | NR                | NA                           | 564    | NR       | NR                                                   | 210       | 346    | 40.3 (12.35)*        | 53.47 (10.85)*       | NR          | NR            | NR        | NR                   | NR                   | NR                      | NR                                         | NR             | 468                 | 5.4          | NR         | 51        | NR          | NR         | NR       | NR    | NR     | NR  |     |      |      |    |
| Papalia      | 2010 | Retrospective | SC                            | Italy                                    | First time, adult, kidney-only transplant recipients                                                             | 1998-2008                      | 5 (3.88)*         | NA                           | 206    | NR       |                                                      |           |        |                      |                      |             |               |           |                      |                      |                         |                                            |                |                     |              |            |           |             |            |          |       |        |     |     |      |      |    |

Supplemental Table 2: Risk of Bias of Included Studies

| First Author | Year | Study Participation | Study Attrition | Prognostic Factor Measurement | Outcome Measurement | Study Confounding | Statistical Analysis and Reporting | Overall |
|--------------|------|---------------------|-----------------|-------------------------------|---------------------|-------------------|------------------------------------|---------|
| Adekoya      | 2016 | Low                 | NR              | Moderate                      | Low                 | Low               | Low                                | Low     |
| An           | 2016 | Low                 | NR              | Low                           | Low                 | Low               | Low                                | Low     |
| Anderson     | 2015 | Low                 | Low             | Moderate                      | Moderate            | Low               | Low                                | High    |
| Andreoni     | 2013 | Low                 | Low             | Low                           | Moderate            | Low               | Low                                | Low     |
| Andresdottir | 2005 | Low                 | Low             | Moderate                      | Moderate            | High              | High                               | High    |
| Andresdottir | 2005 | Low                 | Low             | Moderate                      | Moderate            | High              | High                               | High    |
| Asderakis    | 2001 | Low                 | Moderate        | Low                           | Low                 | Low               | Low                                | Low     |
| Bay          | 2013 | Low                 | Low             | Low                           | Moderate            | Low               | Low                                | Low     |
| Boffa        | 2017 | Low                 | Low             | Low                           | Low                 | Low               | High                               | High    |
| Brar         | 2013 | Moderate            | NR              | Low                           | Low                 | Low               | Low                                | Low     |
| Cardinal     | 2005 | Low                 | Low             | Low                           | Low                 | Low               | Low                                | Low     |
| Carrier      | 2012 | High                | NR              | Low                           | Low                 | Low               | High                               | High    |
| Courtney     | 2007 | Low                 | NR              | Low                           | Low                 | High              | High                               | High    |
| Diaz         | 2009 | Low                 | NR              | High                          | Low                 | Moderate          | Low                                | High    |
| Dinis        | 2015 | Low                 | NR              | Moderate                      | Moderate            | Moderate          | Low                                | High    |
| Faravardeh   | 2013 | Low                 | NR              | Low                           | Moderate            | Low               | Low                                | Low     |
| Faravardeh   | 2013 | Low                 | NR              | Low                           | Moderate            | Low               | Low                                | Low     |
| Faravardeh   | 2013 | Low                 | NR              | Low                           | Moderate            | Low               | Low                                | Low     |
| Ferrer       | 2009 | Moderate            | NR              | Low                           | Moderate            | Low               | High                               | High    |
| Fuggle       | 2010 | Moderate            | NR              | Moderate                      | Low                 | Low               | High                               | High    |
| Grosso       | 2012 | Low                 | NR              | Low                           | Moderate            | Low               | High                               | High    |
| Heldal       | 2011 | Low                 | NR              | Low                           | Low                 | Moderate          | High                               | High    |
| Heldal       | 2009 | Low                 | NR              | Low                           | Low                 | Moderate          | High                               | High    |
| Heldal       | 2009 | Low                 | NR              | Low                           | Low                 | Moderate          | High                               | High    |
| Heldal       | 2009 | Low                 | NR              | Low                           | Low                 | Moderate          | High                               | High    |
| Huaman       | 2016 | Low                 | NR              | Moderate                      | Low                 | Moderate          | Low                                | High    |
| Ilori        | 2015 | Low                 | NR              | Low                           | Moderate            | Low               | Low                                | Low     |
| Kayler       | 2009 | Moderate            | NR              | Moderate                      | Moderate            | Low               | Low                                | High    |
| Koo          | 2015 | Moderate            | NR              | Moderate                      | Low                 | Low               | Low                                | Low     |
| Kruger       | 2007 | Low                 | NR              | Low                           | High                | Moderate          | Moderate                           | High    |
| Lee          | 2014 | Low                 | NR              | Moderate                      | Low                 | Low               | High                               | High    |
| Lin          | 2004 | Low                 | NR              | Low                           | Low                 | Low               | Low                                | Low     |

|          |      |          |     |      |          |          |          |      |
|----------|------|----------|-----|------|----------|----------|----------|------|
| Lynch    | 2009 | Low      | NR  | Low  | Moderate | Low      | Moderate | High |
| Molnar   | 2012 | Moderate | NR  | Low  | Low      | Low      | High     | High |
| Molnar   | 2011 | Low      | NR  | Low  | Low      | Low      | Low      | Low  |
| Moore    | 2010 | Low      | Low | Low  | Moderate | Low      | Low      | Low  |
| Nanmoku  | 2012 | Low      | NR  | High | Low      | Moderate | Low      | High |
| Papalia  | 2010 | Low      | NR  | Low  | Low      | Low      | Low      | Low  |
| Nee      | 2013 | Low      | Low | Low  | Low      | Low      | Low      | Low  |
| Redfield | 2016 | Low      | NR  | Low  | Low      | Low      | Moderate | Low  |

NR – not reported

Supplemental Figure 1: List of Predictors Identified by One Individual study

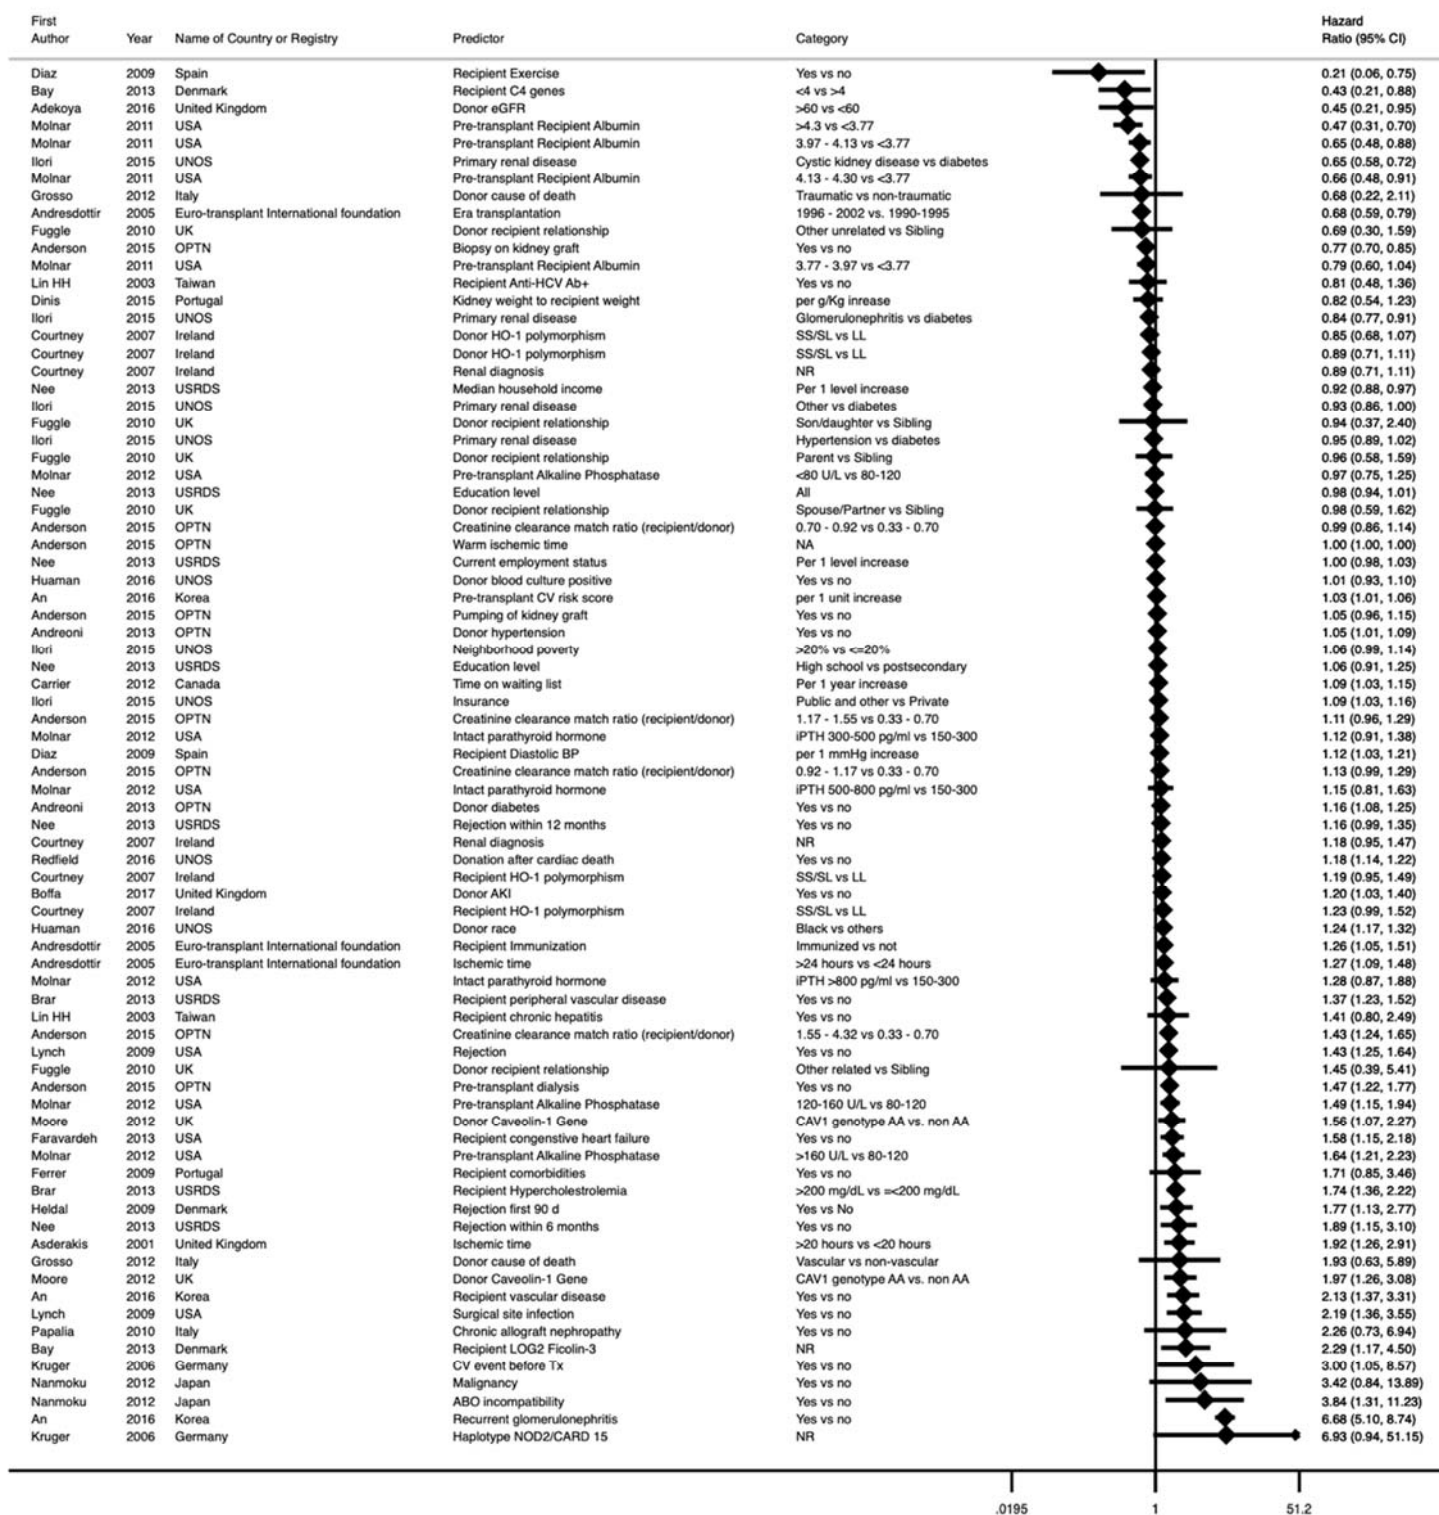

Individual studies reported a greater than 2-fold increase in risk of 1-year graft loss for the following predictors: recipient vascular disease (HR 2.13, 95% CI 1.37 to 3.31), surgical site infection (HR 2.19, 95% CI 1.36 to 3.55), recipient LOG2 Ficolin-3 gene (HR 2.29, 95% CI 1.17 to 4.50), cardiovascular events before transplant (HR 3.00, 95% CI 1.05 to 8.57), Australian aboriginal recipients (HR 3.10, 95% CI 2.24 to 4.28), ABO incompatibility (HR 3.84, 95% CI 1.31 to 11.23), and recurrent glomerulonephritis (HR 6.68, 95% CI 5.10 to 8.74). Similarly, the following prognostic factors were associated with a HR <0.5 for 1-year graft loss: pre-transplant recipient albumin levels (HR 0.47 for >4.3 mg/dL vs <3.77, 95% CI 0.30 to 0.67), donor eGFR (HR 0.45 for >60 mL/min/1.73 m<sup>2</sup> vs <60, 95% CI 0.21 to 0.94), recipient C4 genomic copy number (HR 0.43 for <4 vs ≥4, 95% CI 0.21 to 0.88), and recipient exercise pre-transplant (HR 0.21, 95% CI 0.06 to 0.76).

## Supplemental Material 1: Systematic Search Strategy

All searches executed on February 6, 2017:

Database: Ovid MEDLINE(R) <1946 to January Week 4 2017>  
Search Strategy:

-----

- 1 [kidney transplantation] (0)
- 2 Kidney Transplantation/ (85861)
- 3 exp kidney/tr (69)
- 4 (kidney? adj2 transplant\*).mp. (90052)
- 5 (kidney? adj2 graft\*).mp. (3806)
- 6 (kidney? adj2 allograft\*).mp. (3248)
- 7 (kidney? adj2 allotransplant\*).mp. (213)
- 8 (kidney? adj2 heterograft\*).mp. (2)
- 9 (kidney? adj2 heterotransplant\*).mp. (1)
- 10 (kidney? adj2 homotransplant\*).mp. (109)
- 11 (kidney? adj2 homograft\*).mp. (47)
- 12 (renal adj2 transplant\*).mp. (40446)
- 13 (renal adj2 graft\*).mp. (3147)
- 14 (renal adj2 allograft\*).mp. (11163)
- 15 (renal adj2 allotransplant\*).mp. (428)
- 16 (renal adj2 heterograft\*).mp. (3)
- 17 (renal adj2 heterotransplant\*).mp. (19)
- 18 (renal adj2 homotransplant\*).mp. (330)
- 19 (renal adj2 homograft\*).mp. (249)
- 20 or/2-19 (96397)
- 21 [graft loss] (0)
- 22 graft rejection/ (54629)
- 23 (graft? adj2 loss\*).mp. (5929)
- 24 (transplant adj2 loss\*).mp. (210)
- 25 or/22-24 (58046)
- 26 20 and 25 (23756)
- 27 [predictors/risk/prognostic factors] (0)
- 28 predict\*.mp. (1089664)
- 29 scor\*.tw. (611522)
- 30 observ\*.mp. (2588936)
- 31 validat\*.mp. (342123)
- 32 exp risk/ (985946)
- 33 risk\*.mp. (1848735)
- 34 exp Cohort Studies/ (1609759)
- 35 between group\*.tw. (83478)
- 36 exp prognosis/ (1318869)
- 37 (prognos\* adj2 factor\*).mp. (72868)
- 38 (prognos\* adj2 value\*).mp. (35580)
- 39 (associat\* adj2 factor\*).mp. (117849)
- 40 (independent adj2 factor\*).mp. (57112)
- 41 (multivariate adj2 factor\*).mp. (3082)
- 42 (multivariable\* adj2 factor\*).mp. (504)
- 43 exp Regression Analysis/ (351660)
- 44 regression\*.mp. (535453)
- 45 (hazard\* adj2 model\*).mp. (73870)
- 46 (cox adj2 model\*).mp. (14261)
- 47 (hazard\* adj2 ratio\*).mp. (65084)
- 48 exp survival analysis/ (229756)
- 49 or/28-48 (6848630)
- 50 26 and 49 (13920)

- 51 animals/ not (animals/ and humans/) (4277235)
- 52 50 not 51 (13507)
- 53 limit 52 to ("all infant (birth to 23 months)" or "all child (0 to 18 years)") (3110)
- 54 limit 52 to "all adult (19 plus years)" (8531)
- 55 52 not 53 (10397)
- 56 54 or 55 (12725)
- 57 limit 56 to yr="2000 -Current" (8622)
- 58 from 57 keep 1-4000 (4000)
- 59 from 57 keep 4001-8622 (4622)
- 60 remove duplicates from 58 (3862)
- 61 remove duplicates from 59 (4620)
- 62 60 or 61 (8482)

Database: Ovid MEDLINE(R) In-Process & Other Non-Indexed Citations <February 03, 2017>  
 Search Strategy:

- 
- 1 (kidney? adj2 transplant\*).mp. (3048)
  - 2 (kidney? adj2 graft\*).mp. (199)
  - 3 (kidney? adj2 allograft\*).mp. (212)
  - 4 (kidney? adj2 allotransplant\*).mp. (3)
  - 5 (kidney? adj2 heterograft\*).mp. (0)
  - 6 (kidney? adj2 heterotransplant\*).mp. (2)
  - 7 (kidney? adj2 homotransplant\*).mp. (0)
  - 8 (kidney? adj2 homograft\*).mp. (0)
  - 9 (renal adj2 transplant\*).mp. (2523)
  - 10 (renal adj2 graft\*).mp. (185)
  - 11 (renal adj2 allograft\*).mp. (464)
  - 12 (renal adj2 allotransplant\*).mp. (6)
  - 13 (renal adj2 heterograft\*).mp. (0)
  - 14 (renal adj2 heterotransplant\*).mp. (0)
  - 15 (renal adj2 homotransplant\*).mp. (0)
  - 16 (renal adj2 homograft\*).mp. (1)
  - 17 (graft? adj2 loss\*).mp. (517)
  - 18 (transplant adj2 loss\*).mp. (20)
  - 19 or/1-16 (4867)
  - 20 17 or 18 (535)
  - 21 19 and 20 (337)
  - 22 limit 21 to yr="2000 -Current" (325)

Database: Embase <1974 to 2017 February 03>  
 Search Strategy:

- 
- 1 [kidney transplantation] (0)
  - 2 exp kidney transplantation/ (136804)
  - 3 (kidney? adj2 transplant\*).mp. (127620)
  - 4 (kidney? adj2 graft\*).mp. (52987)
  - 5 (kidney? adj2 allograft\*).mp. (16323)
  - 6 (kidney? adj2 allotransplant\*).mp. (277)
  - 7 (kidney? adj2 heterograft\*).mp. (3)
  - 8 (kidney? adj2 heterotransplant\*).mp. (2)
  - 9 (kidney? adj2 homotransplant\*).mp. (71)
  - 10 (kidney? adj2 homograft\*).mp. (33)
  - 11 (renal adj2 transplant\*).mp. (62067)
  - 12 (renal adj2 graft\*).mp. (6493)
  - 13 (renal adj2 allograft\*).mp. (15758)
  - 14 (renal adj2 allotransplant\*).mp. (503)
  - 15 (renal adj2 heterograft\*).mp. (3)

16 (renal adj2 heterotransplant\*).mp. (12)  
 17 (renal adj2 homotransplant\*).mp. (296)  
 18 (renal adj2 homograft\*).mp. (210)  
 19 or/2-18 (148461)  
 20 [graft loss] (0)  
 21 graft failure/ (30676)  
 22 kidney allograft rejection/ (3283)  
 23 kidney graft rejection/ (14325)  
 24 (graft? adj2 loss\*).mp. (12046)  
 25 (transplant adj2 loss\*).mp. (422)  
 26 or/21-25 (48978)  
 27 19 and 26 (27891)  
 28 [predictors/risk/prognostic factors] (0)  
 29 predict\*.tw. (1566846)  
 30 exp methodology/ (5010109)  
 31 validat\*.tw. (515387)  
 32 risk\*.mp. (3024807)  
 33 exp epidemiology/ (2902080)  
 34 prognosis/ (590179)  
 35 prognostic assessment/ (3012)  
 36 (prognos\* adj2 factor\*).mp. (123954)  
 37 (prognos\* adj2 value\*).mp. (60036)  
 38 (associat\* adj2 factor\*).mp. (185971)  
 39 (independent adj2 factor\*).mp. (96859)  
 40 (multivariate adj2 factor\*).mp. (5218)  
 41 (multivariable\* adj2 factor\*).mp. (937)  
 42 exp regression analysis/ (532262)  
 43 regression\*.mp. (841942)  
 44 (hazard\* adj2 model\*).mp. (123772)  
 45 (cox adj2 model\*).mp. (28915)  
 46 (hazard\* adj2 ratio\*).mp. (113253)  
 47 survival analysis/ (3038)  
 48 (survival adj2 analy\*).mp. (55752)  
 49 or/29-48 (9821988)  
 50 27 and 49 (17324)  
 51 (exp animals/ or exp animal experimentation/ or nonhuman/) not ((exp animals/ or exp animal experimentation/ or nonhuman/) and exp human/) (5926819)  
 52 50 not 51 (17120)  
 53 limit 52 to (embryo <first trimester> or infant <to one year> or child <unspecified age> or preschool child <1 to 6 years> or school child <7 to 12 years> or adolescent <13 to 17 years>) (2277)  
 54 limit 52 to (adult <18 to 64 years> or aged <65+ years>) (8833)  
 55 52 not 53 (14843)  
 56 54 or 55 (16327)  
 57 limit 56 to (book or book series or chapter or conference abstract or conference paper or conference proceeding or "conference review") (5242)  
 58 56 not 57 (11085)  
 59 limit 58 to yr="2000 -Current" (9957)  
 60 from 59 keep 1-5000 (5000)  
 61 from 59 keep 5001-9957 (4957)  
 62 remove duplicates from 60 (4582)  
 63 remove duplicates from 61 (4940)  
 64 62 or 63 (9522)

Database: EBM Reviews - Cochrane Central Register of Controlled Trials <November 2016>  
 Search Strategy:

---

1 [kidney transplantation] (0)  
 2 Kidney Transplantation/ (3195)



3 exp kidney/tr (0)  
 4 (kidney? adj2 transplant\*).mp. (6017)  
 5 (kidney? adj2 graft\*).mp. (1489)  
 6 (kidney? adj2 allograft\*).mp. (364)  
 7 (kidney? adj2 allotransplant\*).mp. (5)  
 8 (kidney? adj2 heterograft\*).mp. (0)  
 9 (kidney? adj2 heterotransplant\*).mp. (0)  
 10 (kidney? adj2 homotransplant\*).mp. (2)  
 11 (kidney? adj2 homograft\*).mp. (2)  
 12 (renal adj2 transplant\*).mp. (3780)  
 13 (renal adj2 graft\*).mp. (324)  
 14 (renal adj2 allograft\*).mp. (921)  
 15 (renal adj2 allotransplant\*).mp. (21)  
 16 (renal adj2 heterograft\*).mp. (0)  
 17 (renal adj2 heterotransplant\*).mp. (0)  
 18 (renal adj2 homotransplant\*).mp. (3)  
 19 (renal adj2 homograft\*).mp. (0)  
 20 or/2-19 (6860)  
 21 [graft loss] (0)  
 22 graft rejection/ (2010)  
 23 (graft? adj2 loss\*).mp. (753)  
 24 (transplant adj2 loss\*).mp. (35)  
 25 or/22-24 (2566)  
 26 20 and 25 (1799)  
 27 [predictors/risk/prognostic factors] (0)  
 28 predict\*.mp. (55289)  
 29 scor\*.tw. (117562)  
 30 observ\*.mp. (155803)  
 31 validat\*.mp. (15583)  
 32 exp risk/ (30591)  
 33 risk\*.mp. (116134)  
 34 exp Cohort Studies/ (123483)  
 35 between group\*.tw. (412183)  
 36 exp prognosis/ (118499)  
 37 (prognos\* adj2 factor\*).mp. (4223)  
 38 (prognos\* adj2 value\*).mp. (1824)  
 39 (associat\* adj2 factor\*).mp. (5529)  
 40 (independent adj2 factor\*).mp. (2939)  
 41 (multivariate adj2 factor\*).mp. (412)  
 42 (multivariable\* adj2 factor\*).mp. (62)  
 43 exp Regression Analysis/ (16965)  
 44 regression\*.mp. (33916)  
 45 (hazard\* adj2 model\*).mp. (7152)  
 46 (cox adj2 model\*).mp. (1654)  
 47 (hazard\* adj2 ratio\*).mp. (11573)  
 48 exp survival analysis/ (16426)  
 49 or/28-48 (596513)  
 50 26 and 49 (1578)  
 51 limit 50 to yr="2000 -Current" (1048)

Database: EBM Reviews - Cochrane Database of Systematic Reviews <2005 to February 02, 2017>  
 Search Strategy:

---

1 (kidney? adj2 transplant\*).mp. (164)  
 2 (kidney? adj2 graft\*).mp. (20)  
 3 (kidney? adj2 allograft\*).mp. (15)  
 4 (kidney? adj2 allotransplant\*).mp. (0)  
 5 (kidney? adj2 heterograft\*).mp. (0)

- 6 (kidney? adj2 heterotransplant\*).mp. (0)
- 7 (kidney? adj2 homotransplant\*).mp. (0)
- 8 (kidney? adj2 homograft\*).mp. (0)
- 9 (renal adj2 transplant\*).mp. (78)
- 10 (renal adj2 graft\*).mp. (4)
- 11 (renal adj2 allograft\*).mp. (6)
- 12 (renal adj2 allotransplant\*).mp. (0)
- 13 (renal adj2 heterograft\*).mp. (0)
- 14 (renal adj2 heterotransplant\*).mp. (0)
- 15 (renal adj2 homotransplant\*).mp. (1)
- 16 (renal adj2 homograft\*).mp. (0)
- 17 (graft? adj2 loss\*).mp. (61)
- 18 (transplant adj2 loss\*).mp. (6)
- 19 or/1-16 (229)
- 20 17 or 18 (62)
- 21 19 and 20 (43)

| PubMed Query                                                                                                                                                                                                                                                                                                                                                                                                                                                                                                                                                                                                                                                                                                                                                                                                                                                                                                                                                                                                                                                                                                                                                                                                                                                                     | Items found |
|----------------------------------------------------------------------------------------------------------------------------------------------------------------------------------------------------------------------------------------------------------------------------------------------------------------------------------------------------------------------------------------------------------------------------------------------------------------------------------------------------------------------------------------------------------------------------------------------------------------------------------------------------------------------------------------------------------------------------------------------------------------------------------------------------------------------------------------------------------------------------------------------------------------------------------------------------------------------------------------------------------------------------------------------------------------------------------------------------------------------------------------------------------------------------------------------------------------------------------------------------------------------------------|-------------|
| <p><b>Search</b> (((((((("kidney"[All Fields] OR "kidneys"[All Fields] OR "renal"[All Fields])) AND ("transplant"[Text Word] OR "transplants"[Text Word] OR "transplantation"[Text Word] OR "transplanting"[Text Word] OR "transplanted"[Text Word] OR graft*[Text Word] OR allograft*[Text Word] OR allotransplant*[Text Word] OR heterograft*[Text Word] OR heterotransplant*[Text Word] OR homotransplant*[Text Word] OR homograft*[Text Word]))) AND (((("Graft"[Text Word] OR "grafts"[Text Word] OR "transplant"[Text Word]) AND loss*[Text Word]))) AND (((((((((((predict*[Title/Abstract] OR scor*[Title/Abstract] OR observ*[Title/Abstract] OR "validation"[Title/Abstract] OR "validate"[Title/Abstract] OR risk*[Title/Abstract] OR "cohort"[Title/Abstract]) OR group*[Text Word] OR regression*[Text Word] OR (hazard*[Text Word] AND model*[Text Word]) OR ("cox"[Text Word] AND model*[Text Word]) OR (hazard*[Text Word] AND ratio*[Text Word])) OR (((prognos*[Text Word] OR associat*[Text Word] OR "independent"[Text Word] OR "multivariate"[Text Word] OR multivariable*[Text Word]) AND factor*[Text Word]))) AND ((pubstatusaheadofprint OR publisher[sb] OR pubmednotmedline[sb]))) <b>Filters:</b> Publication date from 2000/01/01 to 2017/12/31</p> | 259         |

## Supplemental Material 2: Details of the Methods

### **Study selection**

Among observational studies of adult ( $\geq 18$  years) kidney recipients receiving their first transplant, we included studies evaluating the association between any prognostic factors and 1-year graft-loss using multivariable analysis (i.e., Cox proportional hazards or logistic regression models). Reasoning that donor age is widely perceived as an important predictor of graft loss, we excluded studies that did not adjust for donor age in their final multivariable model. We also excluded studies with  $< 20$  events in the follow-up period, and those that assessed graft loss beyond the first year if they did not use a time to event analysis that followed the proportional hazard assumption. In order to capture more contemporary transplant cohorts, we excluded studies published before 2000. We did not restrict by language or publication status. If two studies drew their sample from the same population and reported on the same predictors, we included the study with larger sample size. For this reason, due to mandatory reporting from US centres to the United Network of Organ Sharing (UNOS) registry, we only considered US studies using this registry, and excluded US studies from individual centres if the risk factors of interest were reported in the UNOS registry.

Working in pairs, reviewers independently screened titles and abstracts of identified citations and evaluated the full text of articles deemed potentially eligible by either reviewer. We resolved disagreements through discussion or adjudication by a third reviewer.

### **Data abstraction**

Three pairs of independent reviewers, working in duplicate, extracted data from eligible studies. We extracted data related to center(s) at which data were collected, time frame of recruitment, and the definition and number of graft failures. Reviewers recorded the general characteristics of

cohorts from the individual studies: recipient age, sex, body mass index (BMI), race, diabetes, hypertension, duration of time on dialysis, immunosuppressive regiment, delayed graft function, acute rejection, donor age, sex, type (live vs deceased), quality (standard vs extended criteria), ischemic time, and sex mismatch between donor and recipient.

From each eligible study, reviewers abstracted key information about each predictor: the definition, estimate of effect, and confidence interval. We also recorded information about the outcome definitions; for example, whether graft loss was death-censored or not.

### **Data Synthesis**

When studies reported continuous prognostic variables as ordinal variables, if we observed a linear relation between the increasing order and risk of graft loss, we averaged the beta-coefficients across categories to obtain the estimate of effect associated with a unit change for the meta-analysis. If we observed no linear relation, we reported the effect estimate separately for each category. For studies that had stratified the overall cohort into two or more groups and conducted the same regression model separately in each group, we pooled the effect estimates for the predictors to obtain one for the entire cohort. We pooled HR estimates for each predictor through inverse variance analysis using random-effects meta-analysis. If only two studies assessed the same predictor with one much larger than the other, we pooled results using the fixed effect framework.

### **Subgroup hypotheses**

Risk of bias: We hypothesized greater strength of association between the prognostic factor and the outcome of interest for studies classified as high risk of bias compared to low risk of bias.

Definition of outcome: The primary analysis for each predictor in this review pooled those studies reporting on death-censored graft-loss at one year with those studies considering a non-

death-censored graft loss. We postulated that the power of predictor variables may differ depending on which of these two outcomes measures the studies used. Moreover, we postulated that the direction of this difference may vary for donor-related, transplant related or recipient-related risk factors. For donor-specific and transplant-specific factors, we postulated a stronger association with death-censored graft-failure compared to the composite of graft failure and all-cause mortality. For recipient-specific factors, we postulated the opposite: a stronger relation with graft failure combined with all-cause mortality.
